# Supplementary material for: In vivo pharmacokinetics of T2contrast agents based on iron oxide nanoparticles: optimization of blood circulation times
Source: Royal Society of Chemistry journal article supplement (doi:10.1039/c5ra15680g), 2015-01-01
Supplement: c5ra15680g1.pdf [file c5ra15680g1.pdf]

Supporting Information.

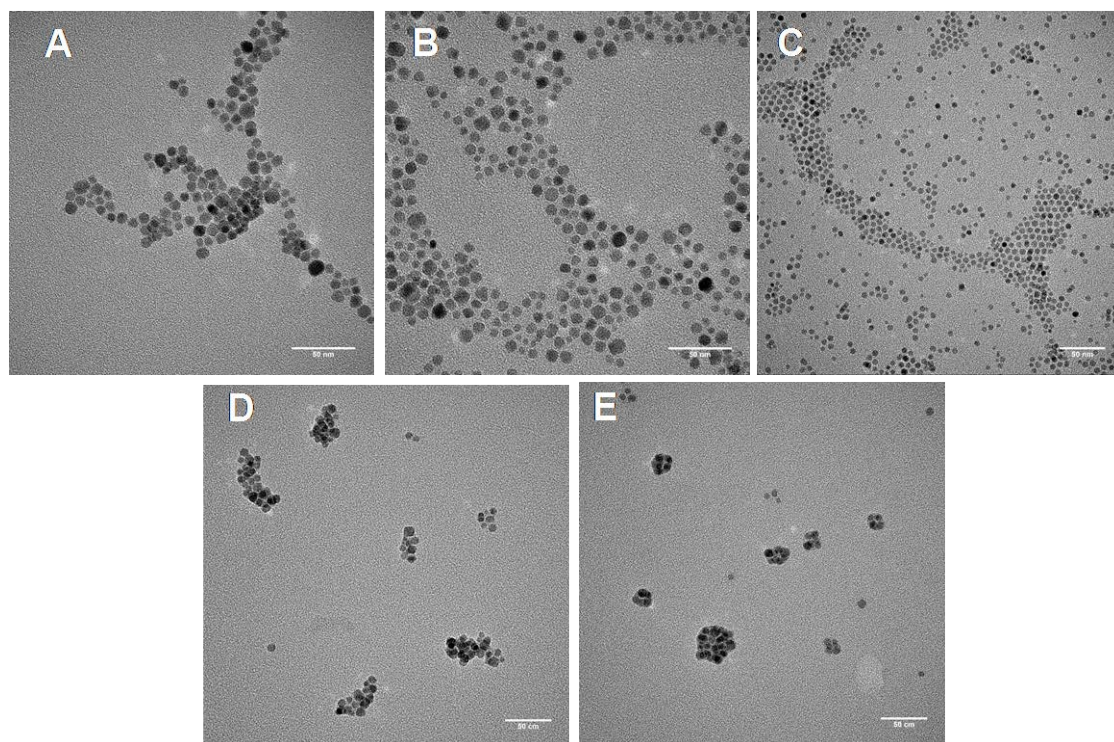

**Figure S1.** Representative TEM images of water soluble molecular weight PEGylated iron oxide nanoparticles. A) PEG600-SPIONs; B) PEG1500-SPIONs; C) PEG3000-SPION; D) PEG6000-SPIONs and E) PEG8000-SPIONs. Scale bar corresponds to 50 nm.

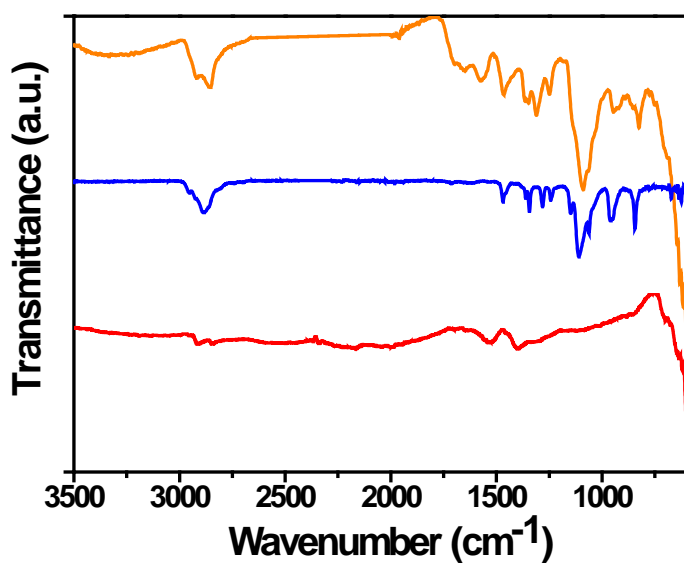

**Figure S2.** FTIR spectra of as prepared iron oxide nanoparticles (red curve), ligand GA-PEG-OH (blue curve) and PEGylated-SPION (orange curve).

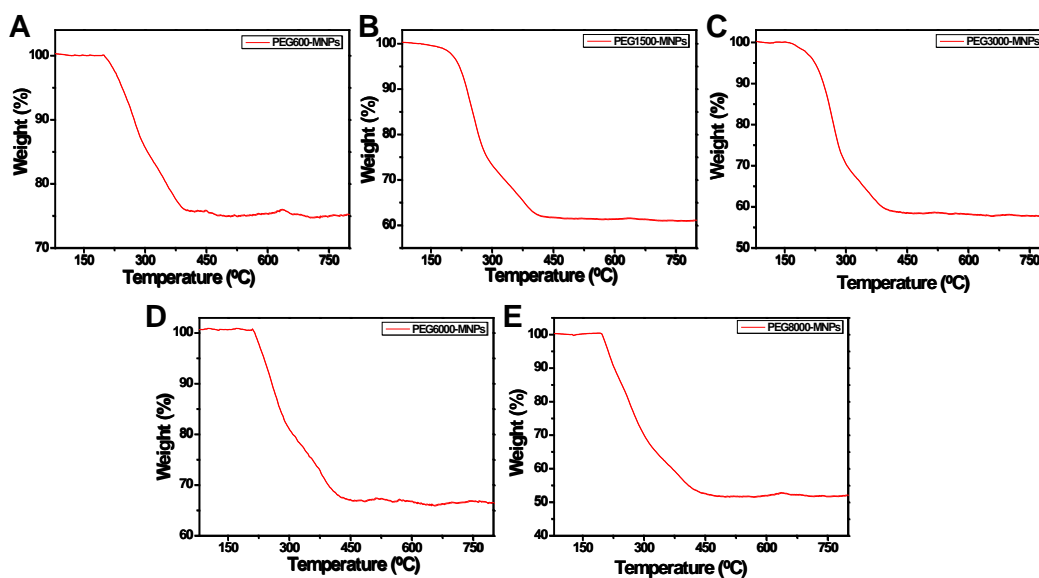

**Figure S3.** Thermogravimetric analysis of A) PEG600-SPIONs; B) PEG1500-SPIONs; C) PEG3000-SPION; D) PEG6000-SPIONs and E) PEG8000-SPIONs.

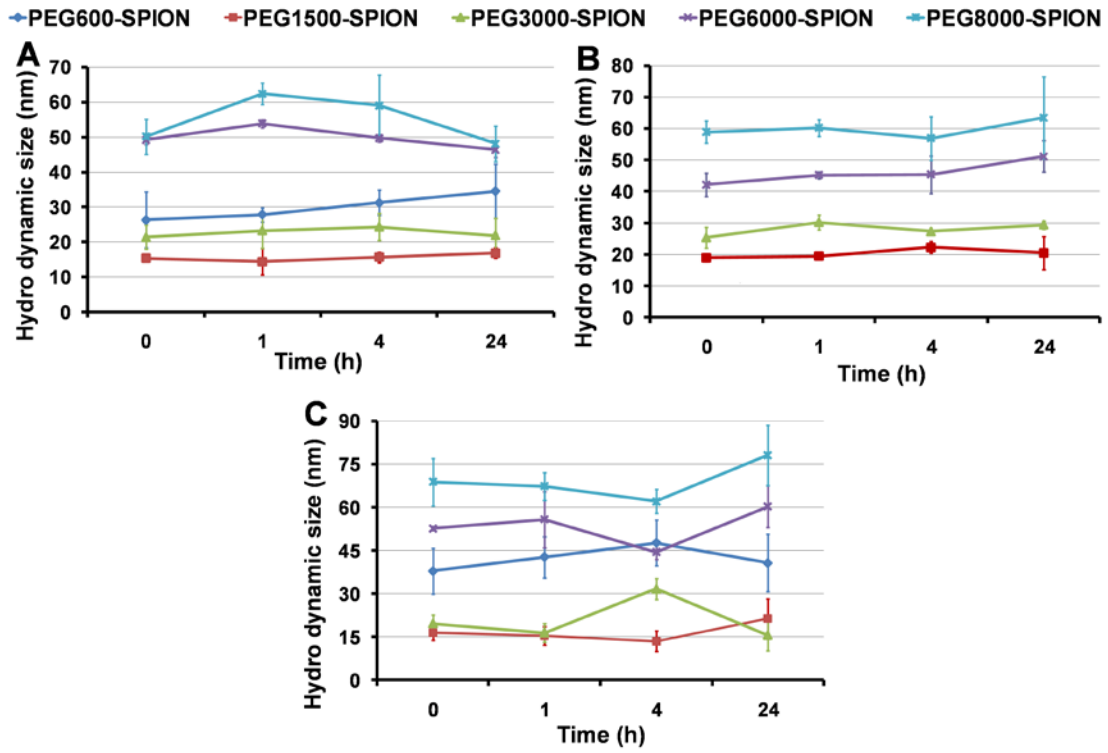

**Figure S4.** Hydrodynamic diameters of PEG-MNPs (500  $\mu\text{g/mL}$ ) with incubation time at 37°C in (A) water at pH 7.2; (B) PBS buffer at pH 7.2 and (C) cell growth medium.

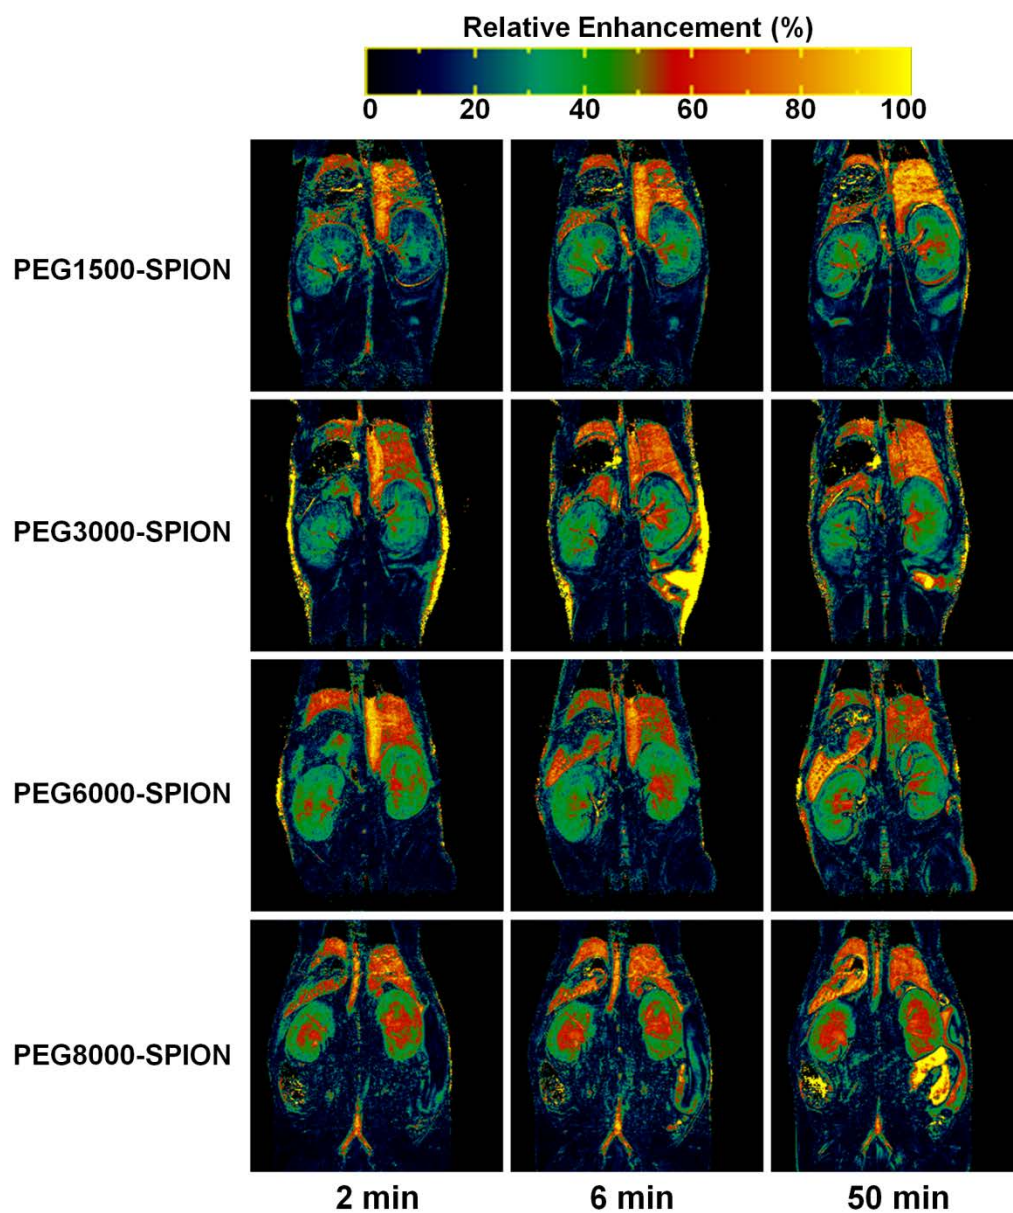

**Figure S5.** Representative color-coded RE parametric maps at 2, 4 and 50 min after injections of different MW PEG-SPIONs.
